# Supplementary material for: Unusual π−–π− stacking interactions between 5,5′-azotetrazolate(AT) anions in six AT based 3d metal photochromic complexes
Source: Royal Society of Chemistry journal article supplement (doi:10.1039/c2ce06606h), 2012-01-01
Supplement: c2ce06606h.pdf [file c2ce06606h.pdf]

## Unusual $\pi$ - $\pi$ Stacking Interactions Between 5,5'-Azotetrazolate(AT) Anions in Six AT Based 3d Metal Photochromic Complexes

Jiao-Min Lin, Yan-Xuan Qiu, Wen-Bin Chen, Meng Yang, Ai-Ju Zhou, Wen Dong, and Chang-En Tian

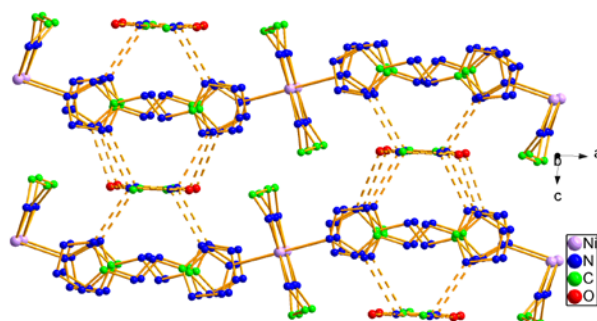

Fig. S1 The 3D supramolecular structure showing the hydrogen bonds in 2.

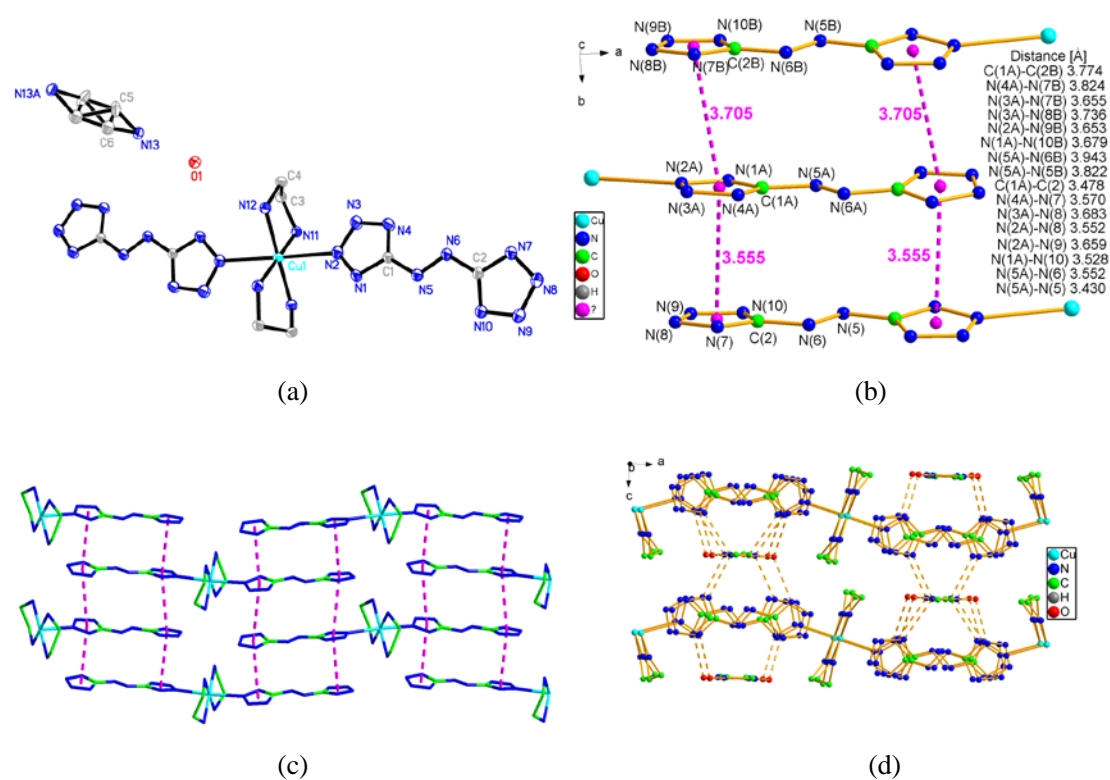

Fig. S2 (a) ORTEP view (30% thermal ellipsoids) of 3, (b) the face-to-face tetrazolate anions alignment showing the  $\pi$ - $\pi$  stacking interaction in 3, (c) layer of  $\pi$ -systems form by  $\pi$ - $\pi$  stacking, (d) the 3D supramolecular structure showing the hydrogen bonds. Symmetry codes: A = 0.5-x, 1-y, z; B = x, -1+y, z.

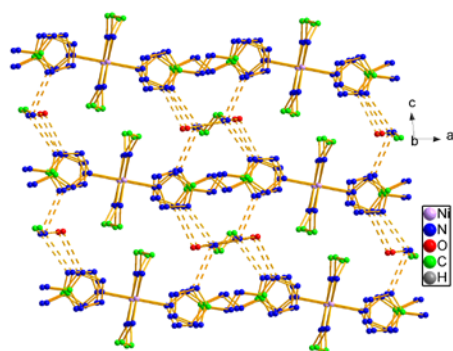

**Fig. S3** The 3D supramolecular structure showing the hydrogen bonds in **4**.

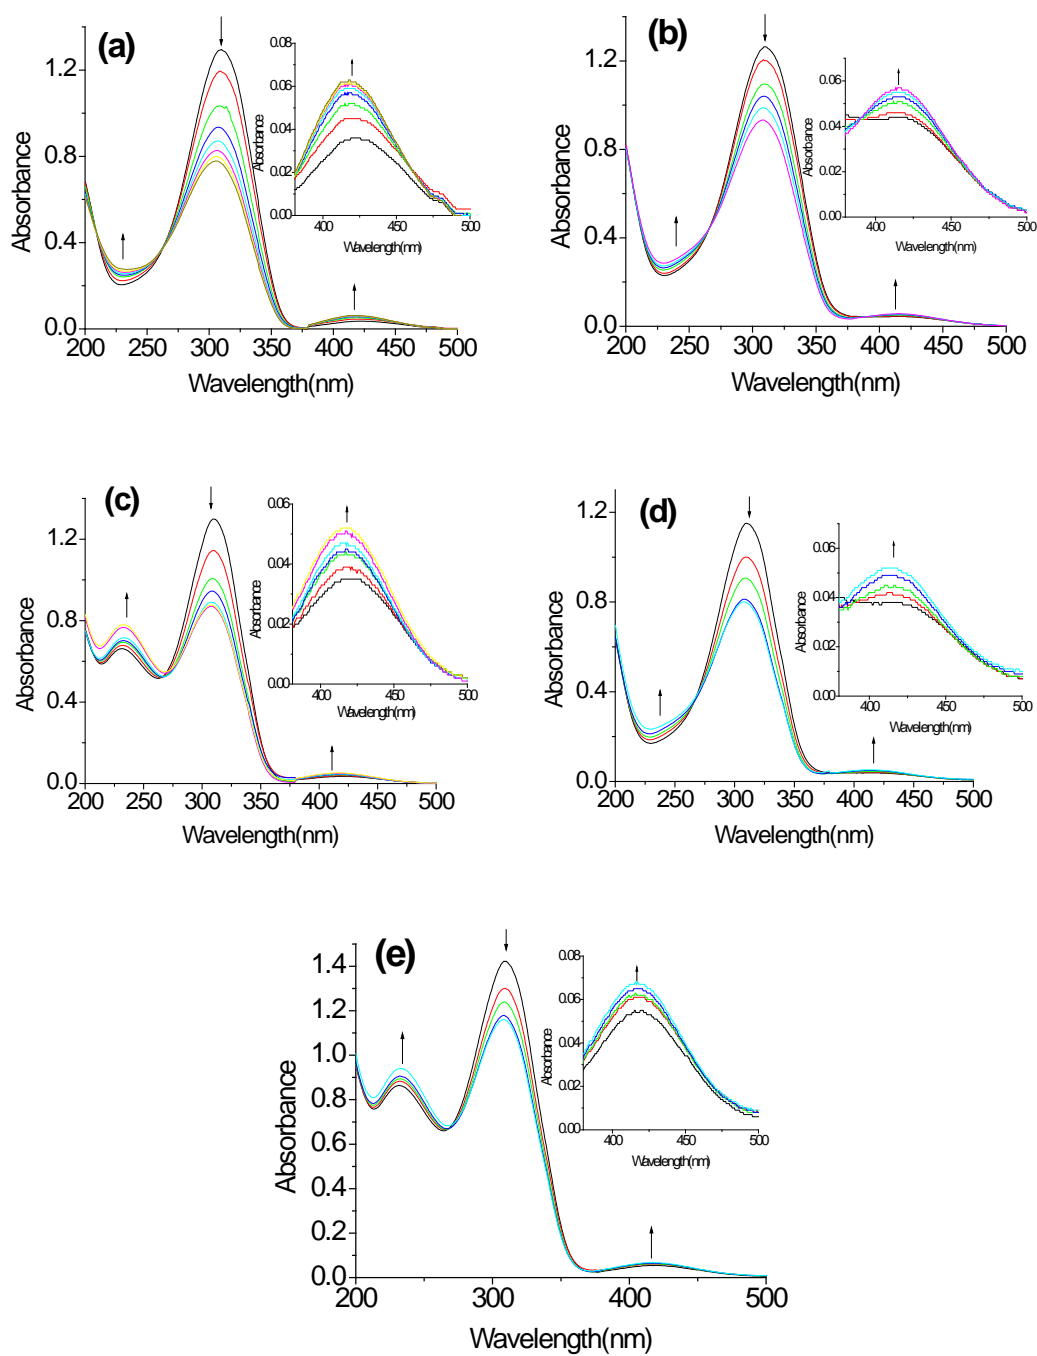

**Fig. S4** UV-vis spectral changes of ligand SAT (a) and complexes **2** (b), **3** (c), **4** (d), and **5** (e) in aqueous solutions with the concentration of  $2 \times 10^{-5}$  mol.L<sup>-1</sup> upon repeated irradiation at 312 nm at 2 min intervals at room temperature.

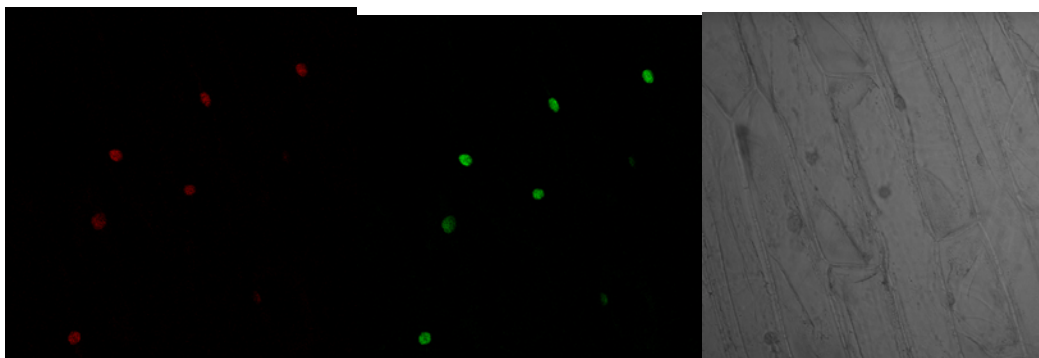

**Fig. S5** The multicolor imaging of onion cell using SAT as imaging agent under 408nm laser excitation. The onion sample was first immersed in 8% HCl for 5 minutes and washed with H<sub>2</sub>O, then immersed in a  $10^{-3}$  mol.L<sup>-1</sup> aqueous solutions of **SAT** for 20 minutes and washed with an amount of H<sub>2</sub>O.

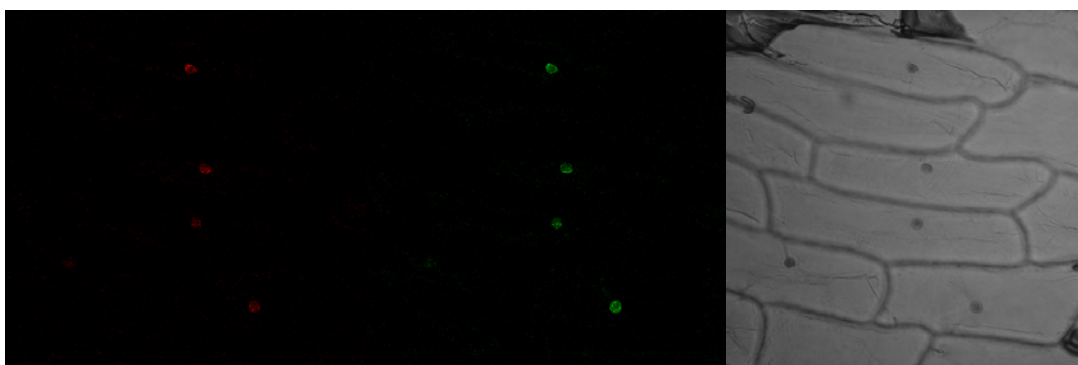

**Fig. S6** The multicolor imaging of onion cell using **1** as imaging agent under 408nm laser excitation. The onion sample was first immersed in 8% HCl for 5 minutes and washed with H<sub>2</sub>O, then immersed in a  $10^{-3}$  mol.L<sup>-1</sup> aqueous solutions of **1** for 20 minutes and washed with an amount of H<sub>2</sub>O.

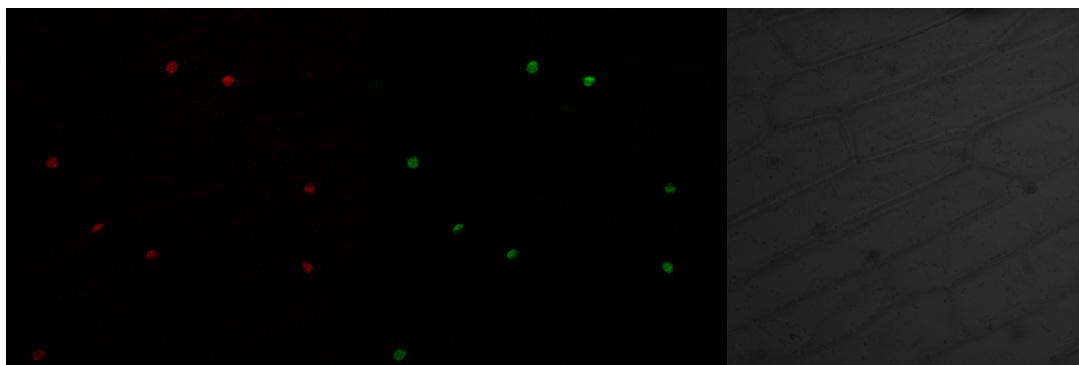

**Fig. S7** The multicolor imaging of onion cell using **3** as imaging agent under 408nm laser excitation. The onion sample was first immersed in 8% HCl for 5 minutes and washed with H<sub>2</sub>O, then immersed in a  $10^{-3}$  mol.L<sup>-1</sup> aqueous solutions of **3** for 20 minutes and washed with an

amount of H<sub>2</sub>O.

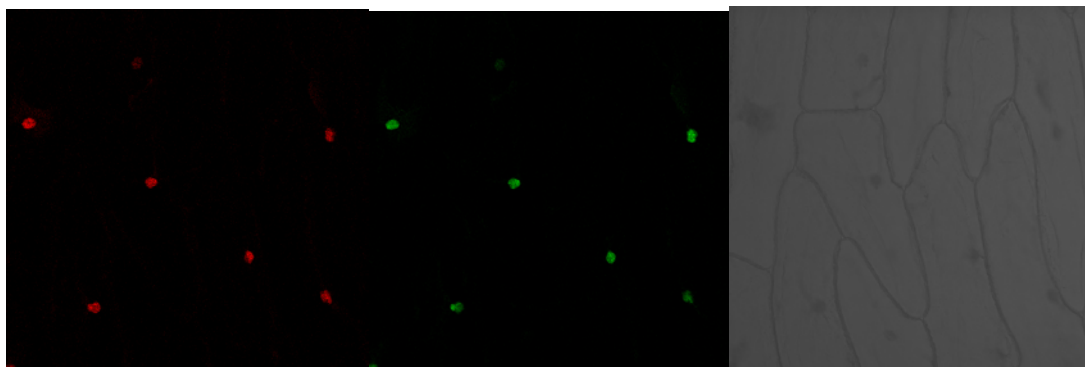

**Fig. S8** The multicolor imaging of onion cell using **4** as imaging agent under 408nm laser excitation. The onion sample was first immersed in 8% HCl for 5 minutes and washed with H<sub>2</sub>O, then immersed in a 10<sup>-3</sup> mol.L<sup>-1</sup> aqueous solutions of **4** for 20 minutes and washed with an amount of H<sub>2</sub>O.

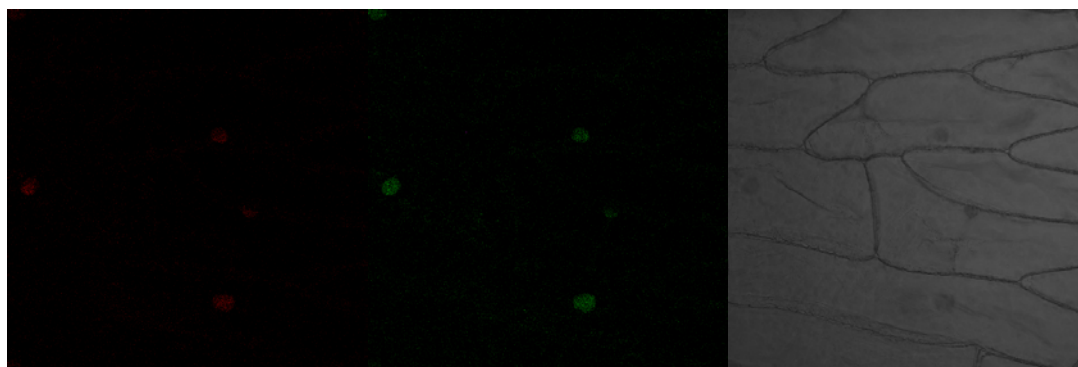

**Fig. S9** The multicolor imaging of onion cell using **5** as imaging agent under 408nm laser excitation. The onion sample was first immersed in 8% HCl for 5 minutes and washed with H<sub>2</sub>O, then immersed in a 10<sup>-3</sup> mol.L<sup>-1</sup> aqueous solutions of **5** for 20 minutes and washed with an amount of H<sub>2</sub>O.

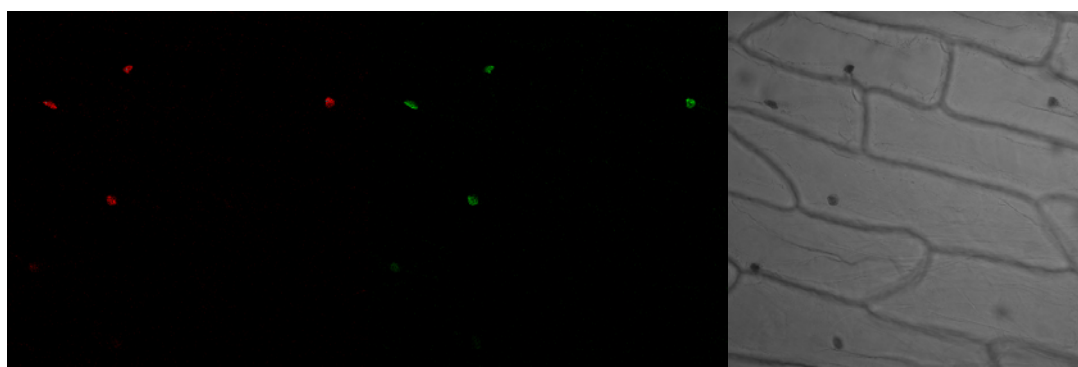

**Fig. S10** The multicolor imaging of onion cell using **6** as imaging agent under 408nm laser excitation. The onion sample was first immersed in 8% HCl for 5 minutes and washed with H<sub>2</sub>O, then immersed in a 10<sup>-3</sup> mol.L<sup>-1</sup> aqueous solutions of **6** for 20 minutes and washed with an amount of H<sub>2</sub>O.
